# Supplementary material for: Callus Induction from Diverse Explants and Genotypes Enables Robust Transformation of Perennial Ryegrass (Lolium perenne L.)
Source: MDPI journal article supplement (doi:10.3390/plants11152054), 2022-08-05
Supplement: s1 [file s1]

Supplementary Table S1. Summary of the perennial ryegrass (*Lolium perenne* L.) transformation reported. Seeds (S), shoot tips (ST), immature embryo (IE), inflorescence (II), axillary bud (AB), meristematic region (MR) and meristem (M).

| Reference                           | Explant   | Genotype                      | Transformation method            | <i>A. tumefaciens</i> strain |
|-------------------------------------|-----------|-------------------------------|----------------------------------|------------------------------|
| van der Maas et al. (1994) [13]     | S         | Aurora                        | biolistic                        | -                            |
| Spangenberg et al. (1995) [14]      | S         | Citadel                       | biolistic                        | -                            |
| Wang et al. (1997) [15]             | NA        | Lp 8-1, Lp 6-1                | direct gene transfer             | -                            |
| Dalton et al. (1998) [16]           | ST        | S23 Z                         | silicon carbide fiber            | -                            |
| Dalton et al. (1999) [17]           | ST        | S23 Z                         | biolistic                        | -                            |
| Altpeter et al. (2000) [18]         | S, IE, II | Limes, Aurora, L 6, Lisabelle | biolistic                        | -                            |
| Xu et al. (2001) [19]               | S         | NA                            | biolistic                        | -                            |
| Altpeter et al. (2004) [20]         | NA        | NA                            | biolistic, <i>A. tumefaciens</i> | AGL1                         |
| Hisano et al. (2004) [21]           | S         | Riikka                        | biolistic                        | -                            |
| Petrovska et al. (2004) [22]        | S         | Kelvin                        | biolistic                        | -                            |
| Chen et al. (2005) [23]             | S         | Majesty, Lisabelle            | biolistic                        | -                            |
| Wu et al. (2005) [24]               | S         | Topgun                        | <i>A. tumefaciens</i>            | LBA4404, EHA105              |
| Altpeter et al. (2006) [25]         | AB        | Limes                         | <i>A. tumefaciens</i>            | AGL0                         |
| Bajaj et al. (2006) [26]            | MR        | Tolosa                        | <i>A. tumefaciens</i>            | EHA101                       |
| Cao et al. (2006) [27]              | S         | Medalist Gold                 | <i>A. tumefaciens</i>            | EHA105                       |
| Petersen et al. (2006) [28]         | M         | F6                            | biolistic                        | -                            |
| Sato et al. (2006) [29]             | ST        | Norlea                        | <i>A. tumefaciens</i>            | EHA101                       |
| Wu et al. (2007) [30]               | S         | Topgun                        | <i>A. tumefaciens</i>            | NA                           |
| Gadegaard et al. (2008) [31]        | M         | N2, F6                        | biolistic                        | -                            |
| Li et al. (2011) [32]               | NA        | NA                            | <i>A. tumefaciens</i>            | NA                           |
| Wu et al. (2012) [33]               | S         | NA                            | <i>A. tumefaciens</i>            | AGL1                         |
| Patel et al. (2013) [34]            | S         | Citation IV                   | <i>A. tumefaciens</i>            | EHA105                       |
| Zhang et al. (2013) [35]            | S         | MontereyII                    | <i>A. tumefaciens</i>            | EHA105                       |
| Vail et al. (2015) [36]             | NA        | NA                            | <i>A. tumefaciens</i>            | AGL1                         |
| Cen et al. (2016) [37]              | S         | Citation IV                   | <i>A. tumefaciens</i>            | EHA105                       |
| Panter et al. (2017) [38]           | S         | FLp418-20                     | biolistic                        | -                            |
| Badenhorst et al. (2018) [39]       | S         | FLp418-20                     | biolistic                        | -                            |
| Xu et al. (2019) [40]               | NA        | NA                            | <i>A. tumefaciens</i>            | AGL1                         |
| Esmaeili et al. (2019) [41]         | S, ST     | Grassland, Numan              | <i>A. tumefaciens</i>            | LBA4404, GV3101              |
| Dalton (2020) [42]                  | ST        | S23 Z                         | <i>A. tumefaciens</i>            | AGL1                         |
| Zhang et al. (2020) [43]            | S         | Goyave                        | biolistic                        | -                            |
| Cooney et al. (2021) [44]           | II        | Alto, Grassland Impact        | biolistic, <i>A. tumefaciens</i> | NA                           |
| Hang et al. (2021) [45]             | S         | Citation Fore                 | <i>A. tumefaciens</i>            | LBA4404                      |
| Yu et al. (2021) [46]               | NA        | NA                            | <i>A. tumefaciens</i>            | NA                           |
| Beechey-Gradwell et al. (2022) [47] | II        | Alto, Grassland Impact        | biolistic, <i>A. tumefaciens</i> | NA                           |
