# Supplementary material for: Callus Induction from Diverse Explants and Genotypes Enables Robust Transformation of Perennial Ryegrass (Lolium perenne L.)
Source: Plants (Basel). 2022 Aug 5;11(15):2054. doi: 10.3390/plants11152054 (PMC9370183; doi:10.3390/plants11152054)
Supplement: Supplementary file 1 [file plants-11-02054-s001.zip]

Archive with 4 entries (4 files):
- Supplementary Table_S2.xlsx
- Supplementary_File_S1.pdf
- Supplementary_File_S2.pdf
- Supplementary_Table_S1.pdf
