# Supplementary material for: Callus Induction from Diverse Explants and Genotypes Enables Robust Transformation of Perennial Ryegrass (Lolium perenne L.)
Source: Plants (Basel). 2022 Aug 5;11(15):2054. doi: 10.3390/plants11152054 (PMC9370183; doi:10.3390/plants11152054)
Supplement: Supplementary file 1 [file plants-11-02054-s001.zip › Supplementary Table_S2.xlsx]

## Sheet: Tabelle1
Supplementary Table S2. Primers used in this study
Primer name	Primer sequence (5’→3’)
153_pL0-seq-F	GTATTACCGCCTTTGAGTGAG
154_pL0-seq-R	CACCTGACGTCTAAGAAACCA
173_RB_L2_seq	GGATAAACCTTTTCACGCCC
174_LB_L2_seq	GTGGTGTAAACAAATTGACGC
175_hptII-seq-F	TCCATCACAGTTTGCCAG
176_hptII-seq-R	CAATACACTACATGGCGTG
177_posthptII_F	CAAGCTTGAATTCTTGCAGC
178_posthptII_R	GCTGCAAGAATTCAAGCTTG
179_sense35S_seq	TTACCAACAACAACAAACAAC
180_senselolp2_seq	GCATAAATACCCGCACAC
163_dsRNAbp-F	TAAGCAAAGCTTCCTCATCCCTTAAACCGCTC
164_dsRNAbp-R	ATTAGCAGATCTGCTTGCATCCACCCGAAG
165_SDUF247-I-F	TAAGCAAAGCTTGATTTAGGCTAGGTTTTGCC
166_SDUF247-I-R	ATTAGCAGATCTGCCTGTTAAAATTGGAAACAATC
167_SDUF247-II-F	TAAGCAAAGCTTATTCCCCAAACGGCTACTG
168_SDUF247-II-R	ATTAGCAGATCTTTCTTATTCCTAATCAATGTGACAG
169_ZDUF247-I-F	TAAGCAAAGCTTCTTCCTCTTCTTCTTCTTCTCC
170_ZDUF247-I-R	ATTAGCAGATCTATTGTTTAATTCCGTGGTAACCC
171_ZDUF247-II-F	TAAGCAAAGCTTCCTCCATTGTTCTTCCTCTC
172_ZDUF247-II-R	ATTAGCAGATCTCCTGCCCAGGAATATGTAC
184_pC1305.1_MSC-F	ACTTTATGCTTCCGGCTC
185_pC1305.1_MSC-R	GAAAAGGGTCCTAACCAAG
MUTE_F1	TGCTCGCTACCTCTGCAAC
MUTE_F2	CTCTTCATTCCCATGCACGC
MUTE_R3	GTAGCACATGGAGAAGTCCGA
ETO1_F	GACCACATCGACTTCAGC-3'
ETO1_R	ACTGTCTGAACCGCAAGC
ETO1_stringF	TGTTACTAGATCGCTCGAATTCG
ETO1_stringR	CCCTTAAGGCCTGTCGAC
RB_rev	GTTTACCCGCCAATATATCCTGTC
hptII F	TTTCCGAGAGCCTTACGTA
hptII R	GCATCGTCGAAATTCCCAT
252_hpt_fw	GATGTAGGAGGGCGTGGATA
253_hpt_rv	GATGTTGGCGACCTCGTATT
Cas9WT_2_F	TCTACGACGTTCGCAAGATG
Cas9WT_2_R	TTCAATGAGAGGGCGCTTAC
EF1Fw	TTGACAAGCGTGTGATCGAG
EF1Rv	TGACCAGGAGCATCAATGAC
